# Supplementary material
Source: publisher figshare collection journal article supplement (https://frontiersin.figshare.com/ndownloader/files/17176823)
Supplement: Supplementary file [file 17176823]

**Supplementary Table 5 – Tabulated data of clinical evaluation scores and Area Under Curve (AUC) of the clinical scores from each dog, after challenge infection from T0 to 10 months, in control, LJM17 and LJM143 immunized and *L. infantum*-Infected groups**

| Beagles ID             | Clinical evaluation scores in different months after infection challenge |    |    |    |    |     | Clinical score AUC |
|------------------------|--------------------------------------------------------------------------|----|----|----|----|-----|--------------------|
|                        | T0                                                                       | T2 | T4 | T6 | T8 | T10 |                    |
| Control group          |                                                                          |    |    |    |    |     |                    |
| 119598                 | 1                                                                        | 3  | 0  | 2  | 2  | 1   | 16                 |
| 119594                 | 1                                                                        | 1  | 1  | 0  | 0  | 2   | 7                  |
| 119593                 | 0                                                                        | 2  | 0  | 3  | 3  | 1   | 17                 |
| 119600                 | 2                                                                        | 2  | 1  | 0  | 1  | 1   | 11                 |
| 119592                 | 1                                                                        | 3  | 0  | 3  | 2  | 4   | 21                 |
| 113230                 | 2                                                                        | 1  | 0  | 3  | 6  | 0   | 22                 |
| 119591                 | 1                                                                        | 1  | 0  | 2  | 3  | 2   | 15                 |
| 113235                 | 1                                                                        | 1  | 1  | 2  | 2  | 2   | 15                 |
| 113238                 | 2                                                                        | 1  | 0  | 2  | 3  | 5   | 19                 |
| 113228                 | 4                                                                        | 2  | 1  | 1  | 2  | 5   | 21                 |
| LJM17 immunized group  |                                                                          |    |    |    |    |     |                    |
| 113237                 | 2                                                                        | 2  | 0  | 6  | 5  | 5   | 33                 |
| 111541                 | 2                                                                        | 2  | 0  | 0  | 3  | 3   | 15                 |
| 113221                 | 1                                                                        | 0  | 0  | 0  | 2  | 3   | 8                  |
| 119595                 | 1                                                                        | 1  | 0  | 2  | 1  | 3   | 12                 |
| 113226                 | 0                                                                        | 1  | 0  | 0  | 2  | 1   | 7                  |
| 113224                 | 1                                                                        | 0  | 0  | 0  | 0  | 2   | 3                  |
| 113225                 | 1                                                                        | 1  | 0  | 1  | 3  | 2   | 13                 |
| 113334                 | 2                                                                        | 2  | 2  | 2  | 2  | 3   | 21                 |
| 113236                 | 1                                                                        | 1  | 1  | 1  | 1  | 4   | 13                 |
| 119597                 | 0                                                                        | 1  | 1  | 1  | 1  | 4   | 12                 |
| LJL143 immunized group |                                                                          |    |    |    |    |     |                    |
| 113222                 | 1                                                                        | 1  | 0  | 4  | 2  | 1   | 16                 |
| 113231                 | 1                                                                        | 1  | 0  | 0  | 3  | 3   | 12                 |
| 111545                 | 0                                                                        | 1  | 1  | 2  | 4  | 4   | 20                 |
| 113240                 | 0                                                                        | 0  | 0  | 1  | 3  | 1   | 9                  |
| 113229                 | 0                                                                        | 0  | 0  | 0  | 4  | 2   | 10                 |
| 111548                 | 1                                                                        | 1  | 0  | 3  | 1  | 3   | 14                 |
| 113233                 | 0                                                                        | 2  | 1  | 3  | 3  | 1   | 19                 |
| 113232                 | 2                                                                        | 1  | 2  | 0  | 2  | 5   | 17                 |
| 111547                 | 2                                                                        | 2  | 2  | 1  | 1  | 0   | 14                 |
| 111552                 | 2                                                                        | 0  | 1  | 1  | 2  | 4   | 14                 |

Representative Data from Figure 2F and 2G, respectively
